# Supplementary material
Source: PubMed Central journal article supplement (PMC6485937)
Supplement: NIHMS1017611-supplement-Supplementary_Tables_and_Figures.pdf [file NIHMS1017611-supplement-Supplementary_Tables_and_Figures.pdf]

## Supplementary Materials

### Planarian cholinesterase: *in vitro* characterization of an evolutionarily ancient enzyme to study organophosphorus pesticide toxicity and reactivation

#### Archives of Toxicology

**Authors:** Danielle Hagstrom\*<sup>1</sup>, Hideto Hirokawa\*<sup>2</sup>, Limin Zhang<sup>2</sup>, Zoran Radic<sup>2</sup>, Palmer Taylor<sup>2</sup>, and Eva-Maria S. Collins<sup>1,3</sup>

\*Authors contributed equally

<sup>1</sup> Division of Biological Sciences, University of California, San Diego, La Jolla, CA 92093, USA

<sup>2</sup> Department of Pharmacology, Skaggs School of Pharmacy and Pharmaceutical Sciences, University of California, San Diego, La Jolla, CA 92093, USA

<sup>3</sup> Department of Physics, University of California, San Diego, La Jolla, CA 92093, USA

#### Corresponding authors:

Eva-Maria S. Collins

Email: emscollins@physics.ucsd.edu

Palmer Taylor

Email: pwtaylor@ucsd.edu

#### Supplemental Tables.

**Table S1.** Calculated  $K_d$  ranges converted from  $IC_{50}$  values for reversible inhibitors

| Inhibitor              | Substrate            |                      |                      |                      |
|------------------------|----------------------|----------------------|----------------------|----------------------|
|                        | 0.1 mM ATCh          | 1 mM ATCh            | 0.1 mM BTCh          | 1 mM BTCh            |
| Ethopropazine          | $5.1 \times 10^{-5}$ | $1.4 \times 10^{-4}$ | $3.4 \times 10^{-5}$ | $1.2 \times 10^{-4}$ |
| BW284c51               | $1.1 \times 10^{-5}$ | $3.5 \times 10^{-6}$ | $8.6 \times 10^{-6}$ | $5.0 \times 10^{-6}$ |
| Donepezil <sup>b</sup> | $8.9 \times 10^{-5}$ | $6.9 \times 10^{-5}$ | ND <sup>a</sup>      | ND <sup>a</sup>      |
| Edrophonium            | $1.7 \times 10^{-5}$ | $1.7 \times 10^{-5}$ | ND <sup>a</sup>      | ND <sup>a</sup>      |
| Tacrine                | $3.4 \times 10^{-5}$ | $1.6 \times 10^{-4}$ | ND <sup>a</sup>      | ND <sup>a</sup>      |

<sup>a</sup>ND (not determined)

<sup>b</sup>Since inhibition was not found to be reversible,  $K_d = IC_{50}$

**Table S2.** Reported  $IC_{50}$  (M) values of reversible inhibitors for human AChE

| Inhibitor              | $IC_{50}$ (M)            | References                       |
|------------------------|--------------------------|----------------------------------|
| Ethopropazine          | $1.8-2.6 \times 10^{-4}$ | (Atack et al. 1989)              |
| BW284c51               | $1.8-2.8 \times 10^{-8}$ | (Giacobini 2000; Giacobini 2001) |
| Donepezil <sup>b</sup> | $5.7 \times 10^{-9}$     | (Giacobini 2000)                 |
| Edrophonium            | $2.5-5.7 \times 10^{-6}$ | (Atack et al. 1989)              |
| Tacrine                | $1.8-2.4 \times 10^{-7}$ | (Giacobini 2000; Giacobini 2001) |
| Propidium <sup>a</sup> | $3.0 \times 10^{-7}$     | (Taylor and Lappi 1975)          |

<sup>a</sup> $K_d$  value for *Torpedo californica* AChE

## Supplemental Figures

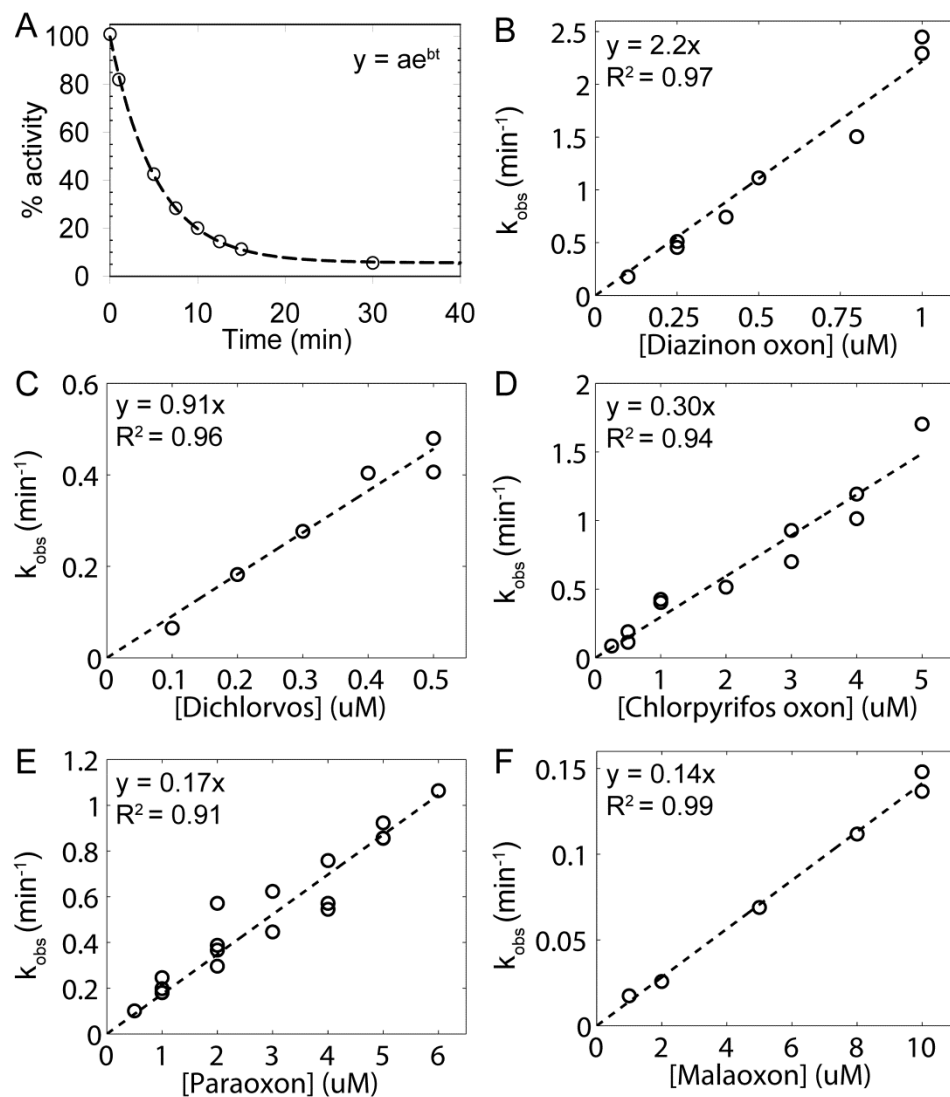

**Fig. S1** Rates of inhibition by OPs. **a** Raw inhibition values obtained over time from inhibition with 1  $\mu\text{M}$  chlorpyrifos oxon shown as an example. Percent activity values over time were fit by an exponential decay regression, equation shown, and the parameters  $a$  and  $b$  ( $k_{\text{obs}}$ ) were determined using SigmaPlot software. This was repeated for each experiment on the varying concentrations of inhibitors. **b-f** For each OP (diazinon oxon (**b**), dichlorvos (**c**), chlorpyrifos oxon (**d**), paraoxon (**e**), and malaoxon (**f**),  $k_{\text{obs}}$  vs concentration was plotted and the bimolecular rate constant ( $k_r$ ) was determined as the slope of the linear regression. Regression equations and  $R^2$  values for each fit are shown

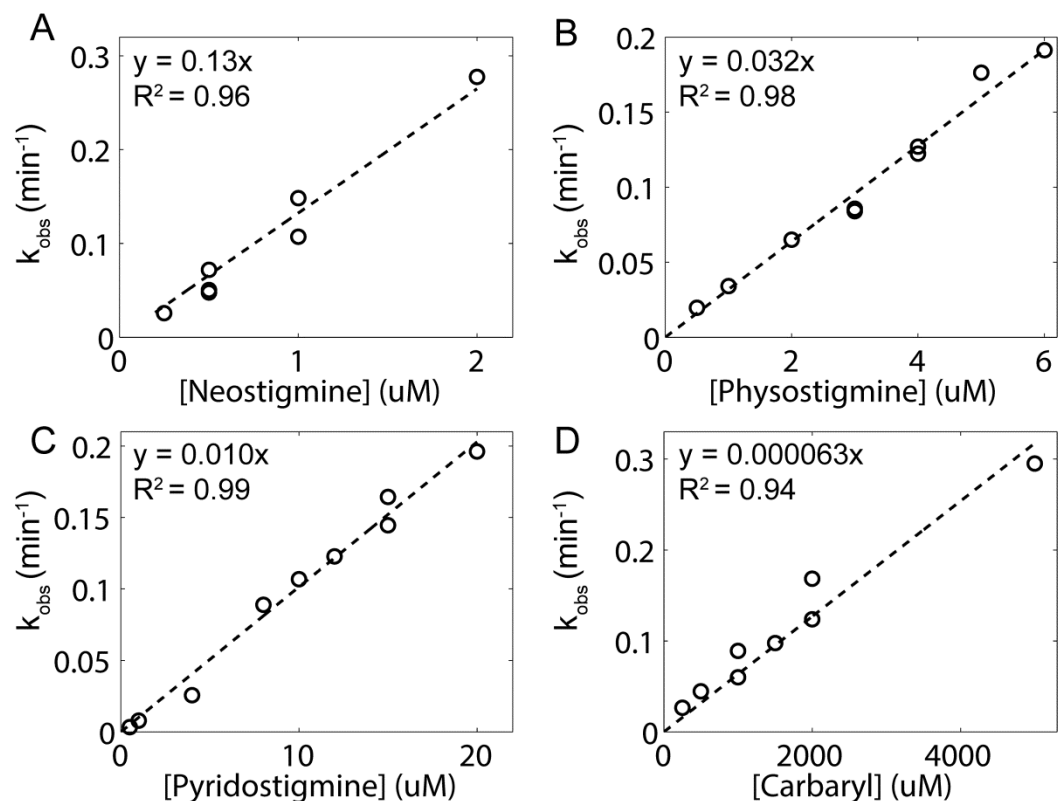

**Fig. S2** Rates of inhibition by carbamylating agents. For the carbamates **a** neostigmine, **b** physostigmine, **c** pyridostigmine, and **d** carbaryl,  $k_{\text{obs}}$  (as calculated in Materials and Methods and Fig S1) was plotted as a function of concentration and the bimolecular rate constant ( $k_r$ ) was determined as the slope of the linear regression. Regression equations and  $R^2$  values for each fit are shown

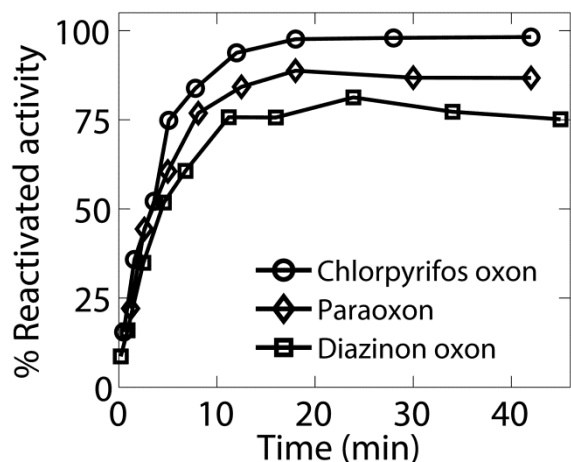

**Fig S3** Reactivation rates are similar for OPs forming the same diethylphosphoryl DjChE conjugate. DjChE inhibited by either 1  $\mu\text{M}$  chlorpyrifos oxon (circles), 5  $\mu\text{M}$  paraoxon (diamonds), or 1  $\mu\text{M}$  diazinon oxon (squares) was reactivated by 100 mM NaF. Percent reactivated activity is based on an uninhibited control measured several times over the course of reactivation. The  $k_{\text{obs}}$  for each OP were found to be similar at 0.25, 0.25 and 0.26  $\text{min}^{-1}$  for chlorpyrifos oxon, paraoxon, and diazinon oxon, respectively
